# Supplementary material for: Metal–organic framework mediated nickel doped copper ferrite for superior lithium storage
Source: Royal Society of Chemistry journal article supplement (doi:10.1039/d1se00200g), 2021-01-01
Supplement: d1se00200g1.pdf [file d1se00200g1.pdf]

**Electronic Supplementary Material ESI for Sustainable Energy & Fuels**

**Metal-Organic Framework Mediated Nickel Doped Copper Ferrite for**

**Superior Lithium Storage**

Muhammad K. Majeed,<sup>†1\*</sup> Adil Saleem,<sup>‡,‡1</sup> M. Umar Majeed,<sup>§</sup> Mina Lotfi,<sup>†</sup> M. M. Hussain<sup>ξ</sup> and  
Hongyu Gong<sup>‡\*</sup>

<sup>†</sup> *State Key Laboratory of Catalysis, Dalian Institute of Chemical Physics, Chinese Academy of Sciences, Dalian, 116023, P.R. China,*

<sup>‡</sup> *School of Materials Science and Engineering, Shandong University, Jinan, 250061, P.R. China.*

<sup>‡</sup> *College of Mechatronics and Control Engineering, Shenzhen University, Shenzhen 518060, Guangdong, P. R. China.*

<sup>§</sup> *Institute of Physics and Electronics, Gomal University, D.I.Khan, 29050, Pakistan,*

<sup>ξ</sup> *School of Materials Science and Engineering, Dalian University of Technology, Dalian, 116024, P.R. China,*

<sup>1</sup> *These authors contributed equally to this work.*

## Supporting Information

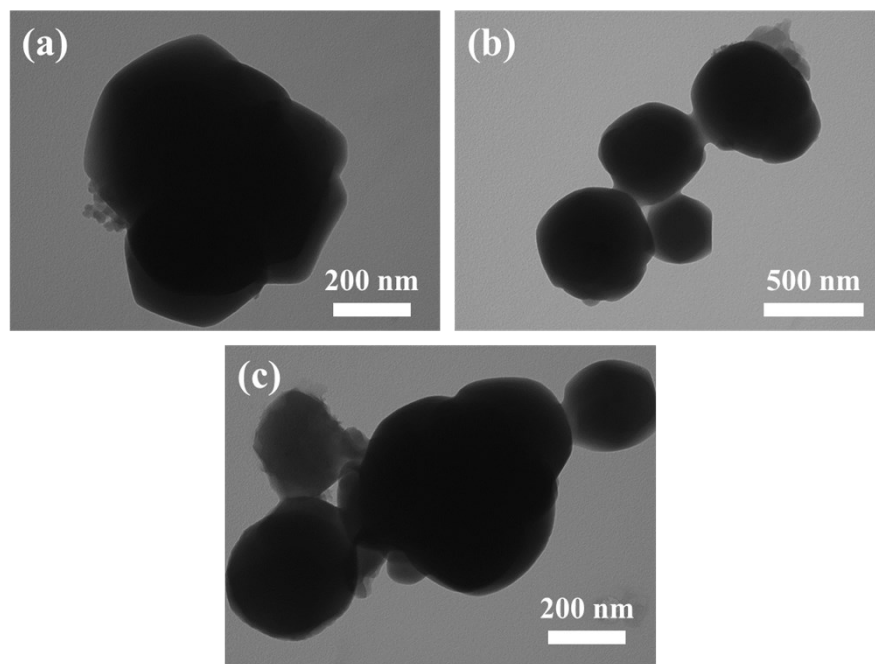

**Figure S1:** TEM images of  $\text{Cu}_{1-x}\text{Ni}_x\text{Fe}_2\text{O}_4@ZIF$  after ZIF coating.

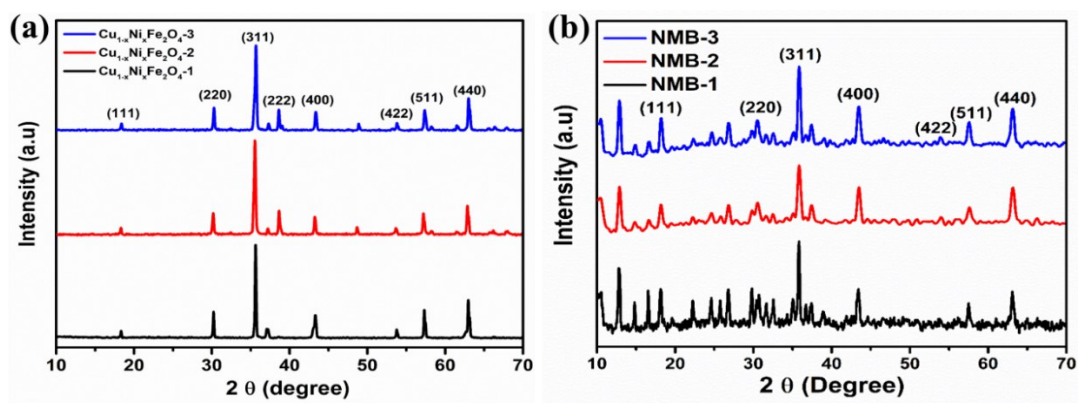

**Figure S2:** XRD patterns of (a)  $\text{Cu}_{1-x}\text{Ni}_x\text{Fe}_2\text{O}_4$  particles, (b)  $\text{Cu}_{1-x}\text{Ni}_x\text{Fe}_2\text{O}_4@ZIF$  before post-calcination.

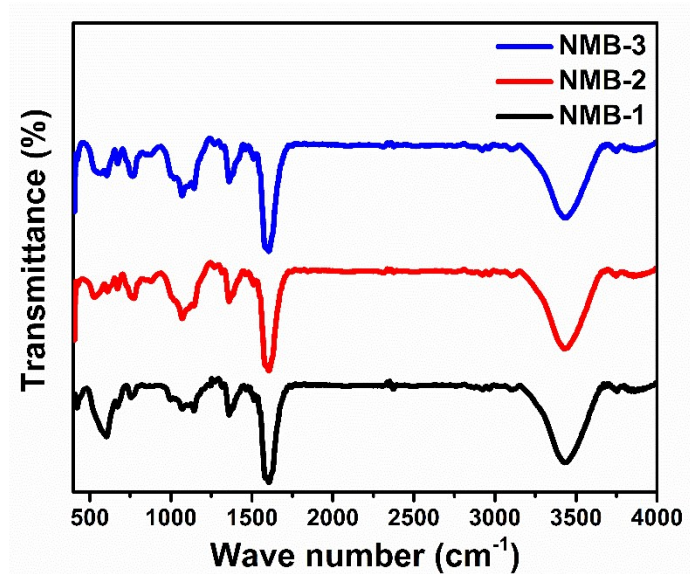

**Figure S3:** FTIR spectra of  $\text{Cu}_{1-x}\text{Ni}_x\text{Fe}_2\text{O}_4@\text{ZIF}$  before post-calcination.

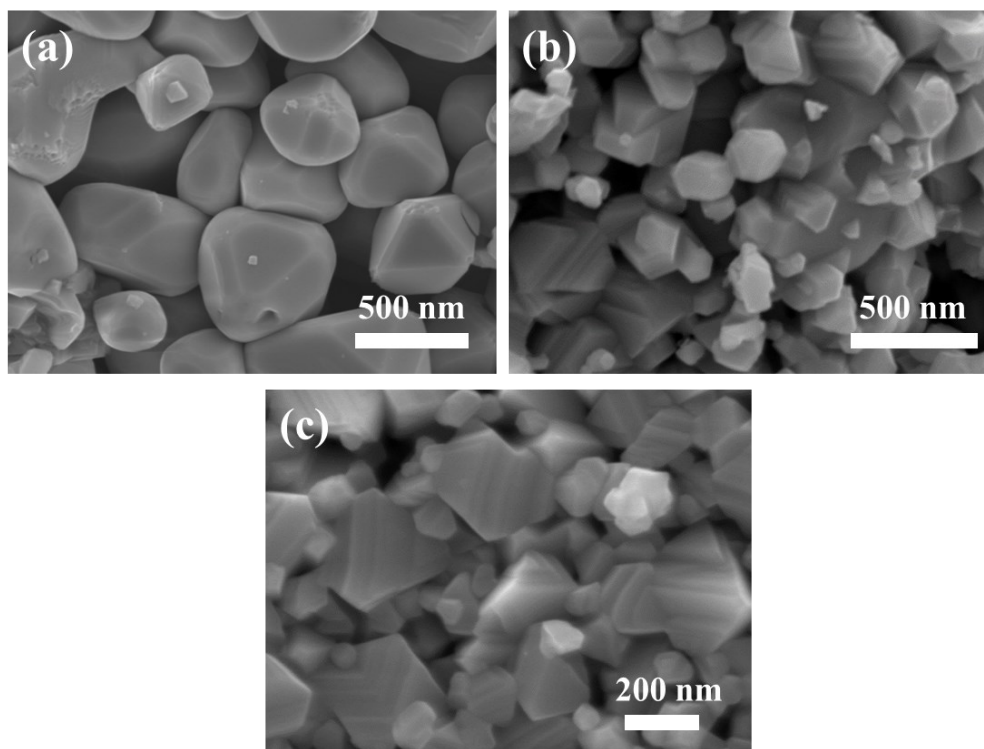

**Figure S4:** SEM images of as-synthesized  $\text{Cu}_{1-x}\text{Ni}_x\text{Fe}_2\text{O}_4$  particles after pre-calcination.

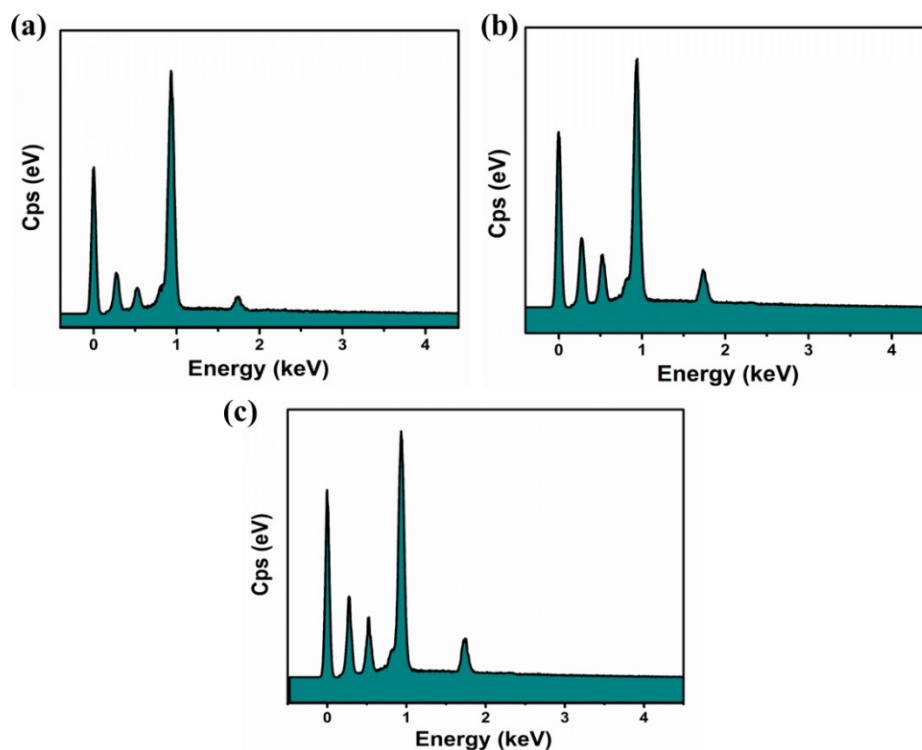

**Figure S5:** EDX analysis of  $\text{Cu}_{1-x}\text{Ni}_x\text{Fe}_2\text{O}_4@\text{C}$  after post-calcination.

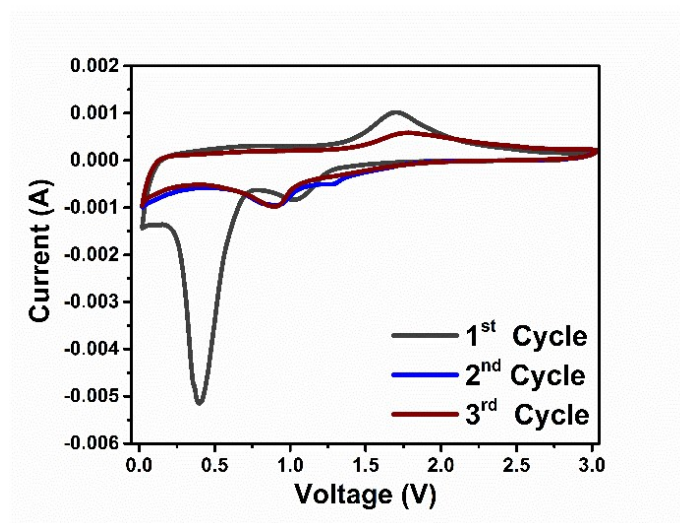

**Figure S6:** Cyclic voltammetry (CV) of  $\text{Cu}_{1-x}\text{Ni}_x\text{Fe}_2\text{O}_4@\text{C}$ .

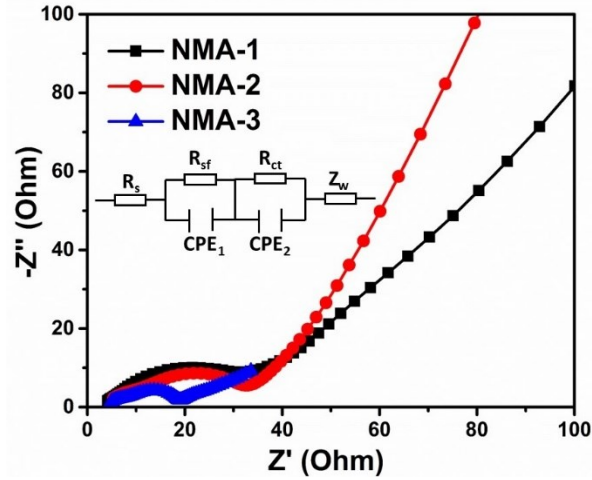

**Figure S7:** EIS spectra of  $\text{Cu}_{1-x}\text{Ni}_x\text{Fe}_2\text{O}_4@\text{C}$  after 50 cycles.

**Table R1.** Comparison of various anode materials in terms of their electrochemical performances.

| Anode                                                                        | Cycling Stability                                  |                                       |              |                                     | Columbic efficiency | Ref      |
|------------------------------------------------------------------------------|----------------------------------------------------|---------------------------------------|--------------|-------------------------------------|---------------------|----------|
|                                                                              | Initial Discharge capacity [ $\text{mAh g}^{-1}$ ] | Capacity after $n^{\text{th}}$ cycles | No of Cycles | Current rate [ $\text{mA g}^{-1}$ ] |                     |          |
| <b><math>\text{CuFe}_2\text{O}_4@\text{rGO}</math></b>                       | 1078                                               | 587                                   | 100          | 100                                 | ~66%                | 1        |
| <b><math>\text{CoFe}_2\text{O}_4/\text{graphene}</math></b>                  | 1683                                               | 501                                   | 25           | 183                                 | 53%                 | 2        |
| <b><math>\text{CuFe}_2\text{O}_4\text{-graphene}</math></b>                  | 1605                                               | 687                                   | 50           | 100                                 | 66%                 | 3        |
| <b><math>\text{CuFe}_2\text{O}_4/\text{rGO}</math></b>                       | 1200                                               | 845                                   | 25           | 100                                 | 73%                 | 4        |
| <b><math>\text{NiFe}_2\text{O}_4/\text{rGO}</math></b>                       | 1363                                               | 1225                                  | 100          | 100                                 | 79%                 | 5        |
| <b><math>\text{NiFe}_2\text{O}_4/\text{graphene}</math></b>                  | 1350                                               | 812                                   | 50           | 100                                 | 67%                 | 6        |
| <b><math>\text{NiFe}_2\text{O}_4@\text{SiO}_2</math></b>                     | 1460                                               | 690                                   | 100          | 100                                 | 71%                 | 7        |
| <b><math>\text{CoFe}_2\text{O}_4/\text{C}</math></b>                         | ~1700                                              | 600                                   | 200          | 185                                 | ~70%                | 8        |
| <b><math>\text{NiFe}_2\text{O}_4/\text{graphene}</math></b>                  | 1575                                               | 407                                   | 50           | 100                                 | 72%                 | 9        |
| <b><math>\text{NiFe}_2\text{O}_4/\text{MWCNT}</math></b>                     | 1305                                               | 871                                   | 25           | 100                                 | 79%                 | 10       |
| <b><math>\text{Cu}_{1-x}\text{Ni}_x\text{Fe}_2\text{O}_4@\text{C}</math></b> | 1428                                               | 722                                   | 500          | 500                                 | 70%                 | Our Work |

## References:

- [1] Junyong W.; Qinglin D.; Mengjiao L.; Kai J.; Jinzhong Z.; Zhigao H.; Junhao C.; Copper ferrites@ reduced graphene oxide anode materials for advanced lithium storage applications, *Sci. Rep.*, 2017, **7**, 8903.
- [2] Songmei L.; Bo W.; Jianghua L.; Mei Y.; In situ one-step synthesis of  $\text{CoFe}_2\text{O}_4$ /graphene nanocomposites as high-performance anode for lithium-ion batteries, *Electrochim. Acta*, 2014, **129**, 33.
- [3] Yongsheng F.; Qun C.; Mingyang H.; Yunhai W.; Xiaoqiang S.; Hui X.; Xin W.; Copper ferrite-graphene hybrid: A multifunctional heteroarchitecture for photocatalysis and energy storage, *Ind. Eng. Chem. Res.* 2012, **51**, 11700.
- [4] Sumair A S.; Iftikhar H G.; Hashim N.; Shafiqullah M.; Muhammad M.; Improved performance of  $\text{CuFe}_2\text{O}_4$ /rGO nanohybrid as an anode material for lithium-ion batteries prepared via facile one-step method, *Current Nanosci.* 2019, **15**, 420.
- [5] Xiaobin T.; Longze Z.; Xiaoping L.; Xi P.; Jianmin Z.; Xiaochuan D.; Qiuhong L.; High index faceted nickel ferrite nanocrystals encapsulated by graphene with high performance for lithium-ion batteries, *Electrochim. Acta*, 2017, **257**, 99.
- [6] Yongsheng F.; Yunhai W.; Hui X.; Xin W.; Nickel ferrite-graphene hetero-architectures: Toward high-performance anode materials for lithium-ion batteries, *J. Power Sources*, 2012, **213**, 338.
- [7] Getong Q.; Xin W.; Jianwu W.; Jing L.; Min Z.; A Core-Shell  $\text{NiFe}_2\text{O}_4$ @ $\text{SiO}_2$  Structure as a High Performance Anode Material for Lithium-Ion Batteries, *ChemElectroChem*, 2019, **6**, 911.
- [8] Yun H J.; Seung D S.; Hyun W S.; Kyung S. P.; Dong W K.; Synthesis of core/shell spinel ferrite/carbon nanoparticles with enhanced cycling stability for lithium ion battery anodes, *Nanotech.* 2012, **23**, 125402.
- [9] Xuefang C.; Ying H.; Kaichaung Z.; Xuansheng F.; S. Li, Self-assembled flower-like  $\text{NiFe}_2\text{O}_4$  decorated on 2D graphene nanosheets composite and their excellent electrochemical performance as anode materials for LIBs, *J. Alloys Comp.* 2016, **686**, 905.
- [10] Muhammad M.; Rafi U K.; Muhammad M.; Mubasher.; Sumai A. S.; Shafiq U.;  $\text{NiFe}_2\text{O}_4$  nanoparticles/MWCNTs nanohybrid as anode material for lithium-ion battery, *Cer. Intl.*, 2019, **45**, 8486.
